# Supplementary material
Source: PubMed Central journal article supplement (PMC4592453)
Supplement: NIHMS712901-supplement-7.pdf [file NIHMS712901-supplement-7.pdf]

**Supplementary Table 1**

| Specimen code | Gender | Age at time of procedure | Initial Dx specimen? | Prior Tx? | Age at first dx | Status at last report        | Classification (WHO 2008)                                                                                             | MYC FISH | MYC IHC (% positive tumor cells) | Other IHC             | Flow cytometry |
|---------------|--------|--------------------------|----------------------|-----------|-----------------|------------------------------|-----------------------------------------------------------------------------------------------------------------------|----------|----------------------------------|-----------------------|----------------|
| HGB-01        | F      | 77                       | Yes                  | No        | -               | Alive, in clinical remission | Diffuse large B-cell lymphoma, NOS                                                                                    | Negative | 20%                              | CD10-, BCL6-/+, IRF4+ |                |
| HGB-02        | M      | 67                       | Yes                  | No        | -               | Alive, in clinical remission | Diffuse large B-cell lymphoma, NOS                                                                                    | Negative | <10%                             | BCL6+                 | CD10+          |
| HGB-03        | M      | 51                       | Yes                  | No        | -               | Alive, in clinical remission | Diffuse large B-cell lymphoma, NOS                                                                                    | Negative | 70%                              | BCL6+                 | CD10+          |
| HGB-04        | F      | 37                       | Yes                  | No        | -               | Alive, in clinical remission | Primary mediastinal large B-cell lymphoma                                                                             | Negative |                                  | CD10-, BCL6+, IRF4+   |                |
| HGB-05        | M      | 66                       | Yes                  | No        | -               | Deceased                     | Diffuse large B-cell lymphoma, NOS                                                                                    | Positive | 90%                              | CD10+, BCL6+, IRF4-   |                |
| HGB-06        | F      | 58                       | Yes                  | No        | -               | Alive, in clinical remission | B-cell lymphoma unclassifiable, with features intermediate between Burkitt lymphoma and diffuse large B-cell lymphoma | Negative | 40%                              | CD10+, BCL6+, IRF4-/+ |                |
| HGB-07        | M      | 46                       | Yes                  | No        | -               | Alive, in clinical remission | Diffuse large B-cell lymphoma and follicular lymphoma, grade 3B                                                       | Positive | 75%                              | BCL6+                 | CD10+          |
| MCL-01        | M      | 69                       | Yes                  | No        | -               | Alive, in clinical remission | Mantle cell lymphoma                                                                                                  | Negative |                                  | CyclinD1+             |                |
| MCL-02        | M      | 64                       | No                   | Yes       | 48              | Alive with disease           | Mantle cell lymphoma                                                                                                  | Negative |                                  | CyclinD1+             |                |
| MCL-03        | F      | 56                       | No                   | Yes       | 53              | Alive, in clinical remission | Mantle cell lymphoma                                                                                                  | Negative |                                  | CyclinD1+             |                |
| MCL-04        | M      | 85                       | Yes                  | No        | -               | Alive with disease           | Mantle cell lymphoma                                                                                                  | Negative |                                  | CyclinD1+             |                |
| SLL-01        | M      | 49                       | No                   | Yes       | 46              | Alive with disease           | Chronic lymphocytic leukemia / small lymphocytic lymphoma                                                             |          |                                  |                       |                |
| SLL-02        | F      | 81                       | No                   | No        | 75              | Alive, in clinical remission | Chronic lymphocytic leukemia / small lymphocytic lymphoma                                                             |          |                                  |                       |                |
| SLL-03        | M      | 45                       | Yes                  | No        | -               | Alive, in clinical remission | Chronic lymphocytic leukemia / small lymphocytic lymphoma                                                             |          |                                  |                       |                |

Supplementary table 2

| Sample | Type | Chr 1 | Strand 1 | Position 1 | Chr 2 | Strand 2 | Position 2 | Tumor reads | Normal panel reads | Class      | Span     | Site 1                                           | Site 2                                       |
|--------|------|-------|----------|------------|-------|----------|------------|-------------|--------------------|------------|----------|--------------------------------------------------|----------------------------------------------|
| HGB-01 | HGB  | 12    | (+)      | 11922736   | 12    | (+)      | 12039080   | 14          | 0                  | inversion  | 116352   | Intron of ETV6(+): 17Kb after exon 2             | Intron of ETV6(+): 122bp after exon 7        |
| HGB-01 | HGB  | 14    | (+)      | 106113558  | 14    | (-)      | 106326972  | 9           | 0                  | deletion   | 213414   | IGR: 121Kb before TMEM121(+)                     | IGR: 57Kb before KIAA0125(+)                 |
| HGB-01 | HGB  | 2     | (+)      | 54981835   | 2     | (-)      | 54983054   | 5           | 0                  | deletion   | 1219     | Intron of EML6(+): 29Kb after exon 1             | Intron of EML6(+): 31Kb after exon 1         |
| HGB-01 | HGB  | 9     | (-)      | 5522369    | 20    | (+)      | 46205727   | 4           | 0                  | inter_chr  | NaN      | 5'-UTR of PDCD1LG2(+): 178bp before coding start | 5'-UTR of NCOA3(+): 45Kb before coding start |
| HGB-01 | HGB  | 3     | (+)      | 56192273   | 3     | (-)      | 56203332   | 3           | 0                  | deletion   | 11059    | Intron of ERC2(-): 9Kb before exon 5             | Intron of ERC2(-): 4Kb after exon 4          |
| HGB-01 | HGB  | 6     | (+)      | 104612424  | X     | (-)      | 46903759   | 3           | 0                  | inter_chr  | NaN      | IGR: 564Kb before HACE1(-)                       | Intron of PHF16(+): 5Kb after exon 8         |
| HGB-01 | HGB  | 6     | (-)      | 159521657  | 6     | (+)      | 159564248  | 3           | 0                  | tandem_dup | 42591    | IGR: 62Kb before TAGAP(-)                        | IGR: 26Kb before FNDC1(+)                    |
| HGB-01 | HGB  | 9     | (+)      | 5521559    | 9     | (-)      | 5589542    | 2           | 0                  | deletion   | 67983    | 5'-UTR of PDCD1LG2(+): 988bp before coding start | IGR: 40Kb before KIAA1432(+)                 |
| HGB-01 | HGB  | 9     | (+)      | 5588252    | 20    | (-)      | 46205839   | 2           | 0                  | inter_chr  | NaN      | IGR: 41Kb before KIAA1432(+)                     | 5'-UTR of NCOA3(+): 45Kb before coding start |
| HGB-02 | HGB  | 14    | (+)      | 106330463  | 18    | (-)      | 60793446   | 52          | 0                  | inter_chr  | NaN      | IGR: 53Kb before KIAA0125(+)                     | 3'-UTR of BCL2(-): 2Kb after coding stop     |
| HGB-02 | HGB  | 5     | (+)      | 88122971   | 5     | (+)      | 88125178   | 36          | 0                  | inversion  | 2204     | 5'-UTR of MEF2C(-): 3Kb before coding start      | 5'-UTR of MEF2C(-): 6Kb before coding start  |
| HGB-02 | HGB  | 5     | (-)      | 88124589   | 5     | (-)      | 88126602   | 25          | 0                  | inversion  | 2013     | 5'-UTR of MEF2C(-): 5Kb before coding start      | 5'-UTR of MEF2C(-): 7Kb before coding start  |
| HGB-02 | HGB  | 1     | (+)      | 244311848  | 1     | (-)      | 244322686  | 3           | 0                  | deletion   | 10838    | IGR: 95Kb before ZNF238(+)                       | IGR: 106Kb before ZNF238(+)                  |
| HGB-03 | HGB  | 14    | (+)      | 106330469  | 14    | (-)      | 106354411  | 49          | 0                  | deletion   | 23942    | IGR: 53Kb before KIAA0125(+)                     | IGR: 29Kb before KIAA0125(+)                 |
| HGB-03 | HGB  | 7     | (-)      | 44380893   | 14    | (+)      | 89735995   | 3           | 0                  | inter_chr  | NaN      | IGR: 41Kb before NUDCD3(-)                       | Intron of FOXN3(-): 11Kb after exon 4        |
| HGB-04 | HGB  | 16    | (+)      | 10971457   | 16    | (+)      | 27325660   | 57          | 0                  | long_range | 16354209 | Intron of CIITA(+): 215bp after exon 1           | 5'-UTR of IL4R(+): 26Kb before coding start  |
| HGB-04 | HGB  | 16    | (-)      | 10972664   | 16    | (-)      | 27326808   | 21          | 0                  | long_range | 16354144 | Intron of CIITA(+): 1Kb after exon 1             | 5'-UTR of IL4R(+): 25Kb before coding start  |
| HGB-04 | HGB  | 17    | (+)      | 43300053   | 17    | (-)      | 43301189   | 16          | 0                  | deletion   | 1136     | Intron of FMNL1(+): 433bp after exon 1           | Intron of FMNL1(+): 2Kb after exon 1         |
| HGB-04 | HGB  | 14    | (+)      | 106065783  | 14    | (-)      | 106326588  | 15          | 0                  | deletion   | 260805   | IGR: 73Kb before TMEM121(+)                      | IGR: 57Kb before KIAA0125(+)                 |
| HGB-04 | HGB  | 1     | (+)      | 93425150   | 5     | (+)      | 138883968  | 13          | 0                  | inter_chr  | NaN      | Intron of FAM69A(-): 2Kb after exon 1            | IGR: 29Kb before TMEM173(-)                  |
| HGB-04 | HGB  | 14    | (+)      | 89773278   | 14    | (-)      | 89849346   | 11          | 0                  | deletion   | 76068    | Intron of FOXN3(-): 26Kb before exon 4           | Intron of FOXN3(-): 29Kb after exon 2        |
| HGB-04 | HGB  | 17    | (-)      | 26132301   | 17    | (+)      | 26139107   | 8           | 0                  | tandem_dup | 6806     | IGR: 5Kb after NOS2(-)                           | IGR: 55Kb before NOS2(-)                     |
| HGB-04 | HGB  | 5     | (+)      | 88175864   | 5     | (-)      | 88177357   | 5           | 0                  | deletion   | 1493     | 5'-UTR of MEF2C(-): 56Kb before coding start     | 5'-UTR of MEF2C(-): 58Kb before coding start |
| HGB-04 | HGB  | 3     | (-)      | 18779884   | 3     | (+)      | 187823100  | 5           | 0                  | tandem_dup | 43216    | IGR: 92Kb before LPP(+)                          | IGR: 49Kb before LPP(+)                      |

|        |     |    |     |           |    |     |           |     |   |            |         |                                                 |                                               |
|--------|-----|----|-----|-----------|----|-----|-----------|-----|---|------------|---------|-------------------------------------------------|-----------------------------------------------|
| HGB-04 | HGB | 1  | (-) | 93425282  | 5  | (-) | 138883726 | 3   | 0 | inter_chr  | NaN     | Intron of FAM69A(-): 2Kb after exon 1           | IGR: 29Kb before TMEM173(-)                   |
| HGB-04 | HGB | 2  | (+) | 231821477 | 2  | (-) | 231827177 | 3   | 0 | deletion   | 5700    | IGR: 39Kb before SPATA3(+)                      | IGR: 34Kb before SPATA3(+)                    |
| HGB-04 | HGB | 7  | (+) | 82581473  | 9  | (+) | 10835416  | 3   | 0 | inter_chr  | NaN     | Exon 5 of PCLO(-)                               | IGR: 223Kb after PTPRD(-)                     |
| HGB-05 | HGB | 2  | (+) | 89157693  | 2  | (-) | 89158830  | 104 | 0 | deletion   | 1130    | IGR: 52Kb after FLJ40330(+)                     | IGR: 53Kb after FLJ40330(+)                   |
| HGB-05 | HGB | 14 | (+) | 106322765 | 14 | (+) | 106324880 | 35  | 1 | inversion  | 2115    | IGR: 61Kb before KIAA0125(+)                    | IGR: 59Kb before KIAA0125(+)                  |
| HGB-05 | HGB | 14 | (+) | 106068560 | 14 | (-) | 106092315 | 6   | 0 | deletion   | 23755   | IGR: 76Kb before TMEM121(+)                     | IGR: 99Kb before TMEM121(+)                   |
| HGB-05 | HGB | 5  | (+) | 131824289 | 5  | (-) | 131828712 | 4   | 0 | deletion   | 4423    | Intron of IRF1(-): 572bp before exon 3          | Promoter of IRF1(-): 2Kb from tx start        |
| HGB-05 | HGB | 6  | (+) | 134492572 | 14 | (-) | 106240755 | 4   | 0 | inter_chr  | NaN     | Intron of SGK1(-): 203bp after exon 11          | IGR: 143Kb before KIAA0125(+)                 |
| HGB-05 | HGB | 8  | (-) | 129185231 | 22 | (+) | 23222979  | 3   | 0 | inter_chr  | NaN     | IGR: 23Kb before MIR1208(+)                     | IGR: 7Kb before IGLL5(+)                      |
| HGB-05 | HGB | 16 | (+) | 89556324  | 16 | (-) | 89597180  | 3   | 0 | deletion   | 40856   | 5'-UTR of ANKRD11(-): 173Kb before coding start | Exon 7 of SPG7(+)                             |
| HGB-06 | HGB | 2  | (+) | 89161433  | 2  | (-) | 89512906  | 23  | 0 | deletion   | 351557  | IGR: 55Kb after FLJ40330(+)                     | IGR: 448Kb before FLJ40330(+)                 |
| HGB-06 | HGB | 5  | (+) | 158519449 | 5  | (-) | 158525345 | 20  | 0 | deletion   | 5903    | Intron of EBF1(-): 3Kb after exon 4             | Intron of EBF1(-): 1Kb after exon 1           |
| HGB-06 | HGB | 14 | (+) | 106329426 | 14 | (-) | 106579108 | 6   | 0 | deletion   | 249682  | IGR: 54Kb before KIAA0125(+)                    | IGR: 143Kb before ADAM6(-)                    |
| HGB-06 | HGB | 14 | (+) | 106329445 | 14 | (-) | 106829834 | 4   | 1 | deletion   | 500389  | IGR: 54Kb before KIAA0125(+)                    | IGR: 86Kb before NCRNA00226(+)                |
| HGB-07 | HGB | 14 | (+) | 106329436 | 18 | (-) | 60793456  | 17  | 0 | inter_chr  | NaN     | IGR: 54Kb before KIAA0125(+)                    | 3'-UTR of BCL2(-): 2Kb after coding stop      |
| HGB-07 | HGB | 2  | (-) | 8555359   | 14 | (-) | 107176543 | 9   | 0 | inter_chr  | NaN     | IGR: 267Kb before ID2(+)                        | IGR: 238Kb before LOC100133469(+)             |
| HGB-07 | HGB | 2  | (+) | 8555515   | 14 | (+) | 107176642 | 9   | 0 | inter_chr  | NaN     | IGR: 267Kb before ID2(+)                        | IGR: 238Kb before LOC100133469(+)             |
| MCL-01 | MCL | 11 | (-) | 69346813  | 14 | (+) | 106330468 | 47  | 0 | inter_chr  | NaN     | IGR: 109Kb before CCND1(+)                      | IGR: 53Kb before KIAA0125(+)                  |
| MCL-01 | MCL | 14 | (+) | 106331446 | 14 | (-) | 106539073 | 20  | 0 | deletion   | 207627  | IGR: 52Kb before KIAA0125(+)                    | IGR: 103Kb before ADAM6(-)                    |
| MCL-02 | MCL | 11 | (-) | 69298658  | 14 | (+) | 106330846 | 59  | 0 | inter_chr  | NaN     | IGR: 157Kb before CCND1(+)                      | IGR: 53Kb before KIAA0125(+)                  |
| MCL-02 | MCL | 11 | (+) | 69468029  | 11 | (-) | 69471149  | 14  | 0 | deletion   | 3120    | 3'-UTR of CCND1(+): 2Kb after coding stop       | IGR: 2Kb after CCND1(+)                       |
| MCL-02 | MCL | 14 | (+) | 106330466 | 14 | (-) | 107178838 | 11  | 0 | deletion   | 848372  | IGR: 53Kb before KIAA0125(+)                    | IGR: 240Kb before LOC100133469(+)             |
| MCL-02 | MCL | 2  | (-) | 89161085  | 2  | (-) | 90260251  | 8   | 1 | long_range | 1099166 | IGR: 55Kb after FLJ40330(+)                     | IGR: 1Mb before FLJ40330(+)                   |
| MCL-02 | MCL | 1  | (+) | 26611895  | 1  | (-) | 26639065  | 3   | 0 | deletion   | 27170   | Intron of UBXN11(-): 60bp after exon 10         | 5'-UTR of UBXN11(-): 10Kb before coding start |
| MCL-02 | MCL | 10 | (-) | 75403873  | 10 | (-) | 75531021  | 2   | 0 | inversion  | 127148  | Promoter of MYOZ1(-): 2Kb from tx start         | 3'-UTR of SEC24C(+): 168bp after coding stop  |
| MCL-02 | MCL | 10 | (+) | 75526995  | 10 | (-) | 75531106  | 2   | 0 | deletion   | 4111    | Intron of SEC24C(+): 67bp after exon 14         | 3'-UTR of SEC24C(+): 253bp after coding stop  |
| MCL-03 | MCL | 11 | (-) | 69263501  | 14 | (+) | 106330469 | 338 | 0 | inter_chr  | NaN     | IGR: 192Kb before CCND1(+)                      | IGR: 53Kb before KIAA0125(+)                  |

|            |     |    |     |           |    |     |           |     |   |            |          |                                            |                                          |
|------------|-----|----|-----|-----------|----|-----|-----------|-----|---|------------|----------|--------------------------------------------|------------------------------------------|
| MCL-03     | MCL | 22 | (+) | 22453621  | 22 | (-) | 23247171  | 20  | 0 | deletion   | 793549   | IGR: 142Kb before TOP3B(-)                 | IGR: 17Kb before IGLL5(+)                |
| MCL-03     | MCL | 14 | (+) | 106329444 | 14 | (-) | 106815837 | 7   | 0 | deletion   | 486393   | IGR: 54Kb before KIAA0125(+)               | IGR: 72Kb before NCRNA00226(+)           |
| MCL-03     | MCL | 1  | (-) | 102349419 | 1  | (+) | 149223945 | 6   | 0 | long_range | 46874526 | Intron of OLFM3(-): 47Kb before exon 2     | IGR: 56Kb before LOC388692(+)            |
| MCL-04     | MCL | 14 | (+) | 106330468 | 14 | (-) | 106552286 | 34  | 0 | deletion   | 221818   | IGR: 53Kb before KIAA0125(+)               | IGR: 116Kb before ADAM6(-)               |
| MCL-04     | MCL | 2  | (+) | 89160437  | 2  | (-) | 89326669  | 24  | 0 | deletion   | 166370   | IGR: 54Kb after FLJ40330(+)                | IGR: 261Kb before FLJ40330(+)            |
| MCL-04     | MCL | 11 | (-) | 69370366  | 14 | (+) | 106330466 | 8   | 0 | inter_chr  | NaN      | IGR: 86Kb before CCND1(+)                  | IGR: 53Kb before KIAA0125(+)             |
| SLL-01     | SLL | 14 | (+) | 106329479 | 14 | (-) | 106805206 | 124 | 0 | deletion   | 475727   | IGR: 54Kb before KIAA0125(+)               | IGR: 61Kb before NCRNA00226(+)           |
| SLL-01     | SLL | 14 | (+) | 69257611  | 14 | (-) | 106325701 | 22  | 0 | long_range | 37068120 | Intron of ZFP36L1(-): 377bp before exon 2  | IGR: 58Kb before KIAA0125(+)             |
| SLL-01     | SLL | 22 | (+) | 23199233  | 22 | (-) | 23241800  | 15  | 0 | deletion   | 42609    | IGR: 31Kb before IGLL5(+)                  | IGR: 4Kb after IGLL5(+)                  |
| SLL-01     | SLL | 14 | (+) | 106330468 | 14 | (-) | 106359396 | 11  | 0 | deletion   | 29017    | IGR: 53Kb before KIAA0125(+)               | IGR: 24Kb before KIAA0125(+)             |
| SLL-02     | SLL | 14 | (+) | 106329462 | 14 | (-) | 106370540 | 465 | 0 | deletion   | 41083    | IGR: 54Kb before KIAA0125(+)               | IGR: 13Kb before KIAA0125(+)             |
| SLL-02     | SLL | 14 | (+) | 106330473 | 14 | (-) | 106877612 | 163 | 0 | deletion   | 547139   | IGR: 53Kb before KIAA0125(+)               | IGR: 61Kb before LOC100133469(+)         |
| SLL-02     | SLL | 2  | (+) | 89161072  | 2  | (-) | 89416828  | 39  | 0 | deletion   | 255870   | IGR: 55Kb after FLJ40330(+)                | IGR: 352Kb before FLJ40330(+)            |
| SLL-03     | SLL | 14 | (+) | 106331660 | 14 | (-) | 106350728 | 255 | 0 | deletion   | 19068    | IGR: 52Kb before KIAA0125(+)               | IGR: 33Kb before KIAA0125(+)             |
| SLL-03     | SLL | 14 | (+) | 106351921 | 14 | (-) | 106714359 | 61  | 0 | deletion   | 362438   | IGR: 32Kb before KIAA0125(+)               | IGR: 30Kb before NCRNA00226(+)           |
| SLL-03     | SLL | 14 | (+) | 106329452 | 14 | (-) | 106573292 | 36  | 0 | deletion   | 243840   | IGR: 54Kb before KIAA0125(+)               | IGR: 137Kb before ADAM6(-)               |
| SLL-03     | SLL | 1  | (+) | 175271848 | 7  | (+) | 28735795  | 6   | 0 | inter_chr  | NaN      | IGR: 20Kb before TNR(-)                    | Intron of CREB5(+): 10Kb after exon 1    |
| SLL-03     | SLL | 14 | (+) | 61870835  | 14 | (-) | 61873522  | 6   | 0 | deletion   | 2697     | Intron of PRKCH(+): 13Kb after exon 2      | Intron of PRKCH(+): 16Kb after exon 2    |
| DOHH-2     | HGB | 14 | (+) | 106329452 | 18 | (-) | 60793494  | 407 | 0 | inter_chr  | NaN      | IGR: 54Kb before KIAA0125(+)               | 3'-UTR of BCL2(-): 2Kb after coding stop |
| DOHH-2     | HGB | 14 | (+) | 106212183 | 14 | (-) | 106326380 | 54  | 0 | deletion   | 114197   | IGR: 172Kb before KIAA0125(+)              | IGR: 57Kb before KIAA0125(+)             |
| DOHH-2     | HGB | 2  | (+) | 89160769  | 2  | (+) | 90260249  | 44  | 1 | long_range | 1099479  | IGR: 55Kb after FLJ40330(+)                | IGR: 1Mb before FLJ40330(+)              |
| DOHH-2     | HGB | 8  | (-) | 128748204 | 14 | (+) | 106114283 | 21  | 0 | inter_chr  | NaN      | Promoter of MYC(+): 106bp from tx start    | IGR: 121Kb before TMEM121(+)             |
| DOHH-2     | HGB | 22 | (+) | 23135646  | 22 | (-) | 23247228  | 7   | 0 | deletion   | 111703   | IGR: 30Kb before MIR650(+)                 | IGR: 17Kb before IGLL5(+)                |
| DOHH-2     | HGB | 1  | (+) | 1656297   | 1  | (-) | 1658413   | 4   | 0 | deletion   | 2116     | Promoter of CDK11A(-): 506bp from tx start | Promoter of CDK11A(-): 3Kb from tx start |
| Karpas-422 | HGB | 14 | (+) | 106330465 | 18 | (-) | 60793491  | 88  | 0 | inter_chr  | NaN      | IGR: 53Kb before KIAA0125(+)               | 3'-UTR of BCL2(-): 2Kb after coding stop |
| Karpas-422 | HGB | 14 | (+) | 106212241 | 14 | (-) | 106325742 | 33  | 0 | deletion   | 113493   | IGR: 172Kb before KIAA0125(+)              | IGR: 58Kb before KIAA0125(+)             |
| Karpas-422 | HGB | 15 | (+) | 101476052 | 15 | (-) | 101541546 | 7   | 0 | deletion   | 65494    | Intron of LRRK1(+): 11Kb after exon 2      | Intron of LRRK1(+): 7Kb before exon 7    |

|            |     |    |     |           |    |     |           |     |   |            |          |                                             |                                           |
|------------|-----|----|-----|-----------|----|-----|-----------|-----|---|------------|----------|---------------------------------------------|-------------------------------------------|
| Karpas-422 | HGB | 17 | (+) | 59992809  | 17 | (-) | 60004652  | 7   | 0 | deletion   | 11843    | Intron of INTS2(-): 3Kb before exon 6       | Intron of INTS2(-): 629bp before exon 2   |
| Karpas-422 | HGB | 4  | (-) | 133270462 | 4  | (+) | 139068862 | 4   | 0 | long_range | 5798400  | IGR: 800Kb before PCDH10(+)                 | IGR: 16Kb before SLC7A11(-)               |
| Karpas-422 | HGB | 4  | (-) | 133259086 | 4  | (+) | 139039545 | 3   | 0 | long_range | 5780459  | IGR: 811Kb before PCDH10(+)                 | IGR: 46Kb before SLC7A11(-)               |
| Karpas-422 | HGB | 10 | (-) | 100885631 | 10 | (-) | 101012696 | 3   | 0 | inversion  | 127065   | Intron of HPSE2(-): 18Kb after exon 3       | IGR: 17Kb after HPSE2(-)                  |
| Karpas-422 | HGB | 11 | (+) | 111704725 | 11 | (+) | 111707862 | 3   | 0 | inversion  | 3137     | Intron of ALG9(-): 2Kb after exon 13        | Intron of ALG9(-): 329bp after exon 12    |
| Oci-Ly-1   | HGB | 8  | (+) | 96243998  | 8  | (+) | 128761686 | 420 | 0 | long_range | 32517669 | IGR: 14Kb before C8orf37(-)                 | IGR: 13Kb before MYC(+)                   |
| Oci-Ly-1   | HGB | 14 | (+) | 106330077 | 18 | (-) | 60793548  | 362 | 0 | inter_chr  | NaN      | IGR: 54Kb before KIAA0125(+)                | 3'-UTR of BCL2(-): 2Kb after coding stop  |
| Oci-Ly-1   | HGB | 18 | (+) | 60826572  | 18 | (-) | 60979881  | 105 | 0 | deletion   | 153300   | Intron of BCL2(-): 31Kb before exon 3       | Intron of BCL2(-): 5Kb after exon 2       |
| Oci-Ly-1   | HGB | 14 | (+) | 106093964 | 14 | (-) | 106327833 | 102 | 0 | deletion   | 233869   | IGR: 101Kb before TMEM121(+)                | IGR: 56Kb before KIAA0125(+)              |
| Oci-Ly-1   | HGB | 8  | (+) | 96109429  | 8  | (-) | 96137432  | 80  | 0 | deletion   | 28000    | IGR: 37Kb before PLEKHF2(+)                 | IGR: 9Kb before PLEKHF2(+)                |
| Oci-Ly-1   | HGB | 14 | (+) | 106239381 | 14 | (-) | 106327831 | 52  | 0 | deletion   | 88450    | IGR: 144Kb before KIAA0125(+)               | IGR: 56Kb before KIAA0125(+)              |
| Oci-Ly-1   | HGB | 8  | (+) | 130872889 | 8  | (+) | 131091738 | 32  | 0 | inversion  | 218844   | Intron of FAM49B(-): 2Kb after exon 8       | Intron of ASAP1(-): 412bp after exon 25   |
| Oci-Ly-1   | HGB | 14 | (+) | 106069264 | 14 | (-) | 106239691 | 11  | 0 | deletion   | 170427   | IGR: 76Kb before TMEM121(+)                 | IGR: 144Kb before KIAA0125(+)             |
| Oci-Ly-1   | HGB | 8  | (+) | 96181978  | 8  | (-) | 130859242 | 7   | 0 | long_range | 34677264 | IGR: 36Kb before PLEKHF2(+)                 | Intron of FAM49B(-): 122bp before exon 14 |
| Oci-Ly-1   | HGB | 18 | (+) | 60807790  | 18 | (-) | 60946868  | 7   | 0 | deletion   | 139205   | Intron of BCL2(-): 12Kb before exon 3       | Intron of BCL2(-): 38Kb after exon 2      |
| Oci-Ly-1   | HGB | 8  | (-) | 96208925  | 8  | (-) | 131029425 | 5   | 0 | long_range | 34820500 | IGR: 49Kb before C8orf37(-)                 | IGR: 35Kb before ASAP1(-)                 |
| Oci-Ly-7   | HGB | 2  | (+) | 89160435  | 2  | (-) | 89428188  | 120 | 0 | deletion   | 267837   | IGR: 54Kb after FLJ40330(+)                 | IGR: 363Kb before FLJ40330(+)             |
| Oci-Ly-7   | HGB | 8  | (-) | 128748107 | 14 | (+) | 107170910 | 45  | 0 | inter_chr  | NaN      | Promoter of MYC(+): 208bp from tx start     | IGR: 232Kb before LOC100133469(+)         |
| Oci-Ly-7   | HGB | 14 | (+) | 106330465 | 14 | (-) | 106641695 | 23  | 0 | deletion   | 311230   | IGR: 53Kb before KIAA0125(+)                | IGR: 103Kb before NCRNA00226(+)           |
| Granta-519 | MCL | 11 | (-) | 69391328  | 14 | (+) | 106330475 | 80  | 0 | inter_chr  | NaN      | IGR: 65Kb before CCND1(+)                   | IGR: 53Kb before KIAA0125(+)              |
| Granta-519 | MCL | 11 | (+) | 69466209  | 14 | (-) | 103522460 | 20  | 0 | inter_chr  | NaN      | 3'-UTR of CCND1(+): 159bp after coding stop | Intron of CDC42BPB(-): 876bp after exon 1 |
| Granta-519 | MCL | 22 | (+) | 22517073  | 22 | (-) | 23247168  | 19  | 0 | deletion   | 730100   | IGR: 82Kb before VPREB1(+)                  | IGR: 17Kb before IGLL5(+)                 |
| Granta-519 | MCL | 18 | (+) | 57100190  | 18 | (-) | 57560667  | 4   | 0 | deletion   | 460477   | 3'-UTR of CCBE1(-): 3Kb after coding stop   | IGR: 7Kb before PMAIP1(+)                 |
| Granta-519 | MCL | 18 | (+) | 70764202  | 18 | (+) | 70771031  | 4   | 0 | inversion  | 6829     | IGR: 263Kb before NETO1(-)                  | IGR: 270Kb before NETO1(-)                |
| Granta-519 | MCL | 17 | (-) | 47609291  | 20 | (+) | 9859116   | 3   | 0 | inter_chr  | NaN      | IGR: 37Kb before NGFR(+)                    | IGR: 39Kb after PAK7(-)                   |
| Granta-519 | MCL | 18 | (+) | 37970093  | 18 | (+) | 57560068  | 3   | 0 | long_range | 19589975 | IGR: 1Mb before KC6(-)                      | IGR: 7Kb before PMAIP1(+)                 |
| Granta-519 | MCL | 18 | (+) | 37990606  | 18 | (+) | 57556854  | 2   | 0 | long_range | 19566248 | IGR: 1Mb before KC6(-)                      | IGR: 10Kb before PMAIP1(+)                |

|            |     |    |     |           |    |     |           |     |   |            |               |                                             |                                             |
|------------|-----|----|-----|-----------|----|-----|-----------|-----|---|------------|---------------|---------------------------------------------|---------------------------------------------|
| Granta-519 | MCL | 18 | (-) | 57549365  | 18 | (-) | 57558758  | 2   | 0 | inversion  | 9393          | IGR: 18Kb before PMAIP1(+)                  | IGR: 8Kb before PMAIP1(+)                   |
| JeKo-1     | MCL | 11 | (-) | 69346872  | 14 | (+) | 106330075 | 96  | 0 | inter_chr  | NaN           | IGR: 109Kb before CCND1(+)                  | IGR: 54Kb before KIAA0125(+)                |
| JeKo-1     | MCL | 14 | (+) | 106330468 | 14 | (-) | 107178834 | 34  | 0 | deletion   | 848366        | IGR: 53Kb before KIAA0125(+)                | IGR: 240Kb before LOC100133469(+)           |
| JeKo-1     | MCL | 19 | (-) | 14464765  | 19 | (+) | 14481940  | 18  | 0 | tandem_dup | 17149         | IGR: 27Kb before CD97(+)                    | IGR: 10Kb before CD97(+)                    |
| JeKo-1     | MCL | 12 | (-) | 1101971   | 12 | (-) | 31755450  | 10  | 0 | long_range | 30653479      | 5'-UTR of ERC1(+): 35Kb before coding start | IGR: 45Kb before C12orf72(+)                |
| JeKo-1     | MCL | 8  | (-) | 8144725   | 8  | (-) | 8224936   | 8   | 0 | inversion  | 80211         | IGR: 31Kb before SGK223(-)                  | Intron of SGK223(-): 9Kb after exon 2       |
| JeKo-1     | MCL | 2  | (+) | 111826080 | 2  | (-) | 112467941 | 7   | 0 | deletion   | 641861        | Intron of ACOXL(+): 19Kb after exon 16      | IGR: 59Kb before ANAPC1(-)                  |
| JeKo-1     | MCL | 16 | (-) | 1952972   | 16 | (+) | 31129235  | 7   | 0 | long_range | 29176263      | IGR: 8Kb before HS3ST6(-)                   | Intron of MYST1(+): 22bp after exon 1       |
| JeKo-1     | MCL | 8  | (+) | 8665440   | 8  | (+) | 128773927 | 5   | 0 | long_range | 12010852<br>4 | Intron of MFHAS1(-): 10Kb before exon 2     | IGR: 26Kb before MYC(+)                     |
| JeKo-1     | MCL | 8  | (-) | 127246846 | 8  | (-) | 127432197 | 5   | 0 | inversion  | 185351        | IGR: 318Kb before FAM84B(-)                 | IGR: 132Kb before FAM84B(-)                 |
| JeKo-1     | MCL | 19 | (+) | 14481187  | 19 | (-) | 14482858  | 5   | 1 | deletion   | 1671          | IGR: 11Kb before CD97(+)                    | IGR: 9Kb before CD97(+)                     |
| JeKo-1     | MCL | 8  | (+) | 127348471 | 8  | (-) | 127426217 | 4   | 0 | deletion   | 77746         | IGR: 216Kb before FAM84B(-)                 | IGR: 138Kb before FAM84B(-)                 |
| JeKo-1     | MCL | 12 | (+) | 101211779 | 12 | (-) | 101244172 | 3   | 0 | deletion   | 32393         | 5'-UTR of ANO4(+): 84Kb before coding start | 5'-UTR of ANO4(+): 51Kb before coding start |
| JeKo-1     | MCL | 22 | (+) | 43020556  | 22 | (+) | 43033909  | 3   | 0 | inversion  | 13353         | Intron of CYB5R3(-): 662bp before exon 8    | Intron of CYB5R3(-): 1Kb before exon 2      |
| JeKo-1     | MCL | 12 | (+) | 31755237  | 12 | (+) | 32448271  | 2   | 0 | inversion  | 693034        | IGR: 45Kb before C12orf72(+)                | Intron of BICD1(+): 1Kb after exon 3        |
| Mino       | MCL | 11 | (-) | 69346818  | 14 | (+) | 106330847 | 202 | 0 | inter_chr  | NaN           | IGR: 109Kb before CCND1(+)                  | IGR: 53Kb before KIAA0125(+)                |
| Mino       | MCL | 22 | (+) | 22698073  | 22 | (-) | 23247266  | 118 | 0 | deletion   | 549282        | IGR: 46Kb before LOC96610(+)                | IGR: 17Kb before IGLL5(+)                   |
| Mino       | MCL | 2  | (+) | 231070144 | 2  | (-) | 231471342 | 82  | 0 | deletion   | 401192        | Intron of SP110(-): 3Kb after exon 8        | IGR: 61Kb after SP100(+)                    |
| Mino       | MCL | 14 | (+) | 106329444 | 14 | (-) | 106691742 | 40  | 0 | deletion   | 362298        | IGR: 54Kb before KIAA0125(+)                | IGR: 53Kb before NCRNA00226(+)              |
| Mino       | MCL | 22 | (+) | 23063639  | 22 | (-) | 23241797  | 36  | 0 | deletion   | 178157        | IGR: 75Kb before GGTL2(+)                   | IGR: 4Kb after IGLL5(+)                     |
| Mino       | MCL | 10 | (-) | 26926124  | 10 | (-) | 27239476  | 3   | 0 | inversion  | 313352        | IGR: 6Kb before LOC731789(+)                | IGR: 19Kb before NCRNA00202(-)              |
| Mino       | MCL | 14 | (+) | 106178108 | 14 | (-) | 106324608 | 3   | 0 | deletion   | 146500        | IGR: 185Kb before TMEM121(+)                | IGR: 59Kb before KIAA0125(+)                |
| Rec-1      | MCL | 11 | (-) | 69346856  | 14 | (+) | 106330077 | 85  | 0 | inter_chr  | NaN           | IGR: 109Kb before CCND1(+)                  | IGR: 54Kb before KIAA0125(+)                |
| Rec-1      | MCL | 2  | (+) | 89161436  | 2  | (-) | 89326717  | 56  | 0 | deletion   | 165281        | IGR: 55Kb after FLJ40330(+)                 | IGR: 261Kb before FLJ40330(+)               |
| Rec-1      | MCL | 14 | (+) | 106330447 | 14 | (-) | 106452709 | 41  | 0 | deletion   | 122262        | IGR: 53Kb before KIAA0125(+)                | IGR: 17Kb before ADAM6(-)                   |
| Rec-1      | MCL | 9  | (+) | 139397291 | 9  | (-) | 139439683 | 27  | 0 | deletion   | 42400         | Intron of NOTCH1(-): 346bp before exon 28   | Intron of NOTCH1(-): 492bp after exon 1     |
| Rec-1      | MCL | 11 | (+) | 69466484  | 11 | (-) | 69470422  | 17  | 0 | deletion   | 3938          | 3'-UTR of CCND1(+): 434bp after coding stop | IGR: 1Kb after CCND1(+)                     |

|       |     |    |     |          |    |     |          |   |   |           |        |                                            |                                                 |
|-------|-----|----|-----|----------|----|-----|----------|---|---|-----------|--------|--------------------------------------------|-------------------------------------------------|
| Rec-1 | MCL | 16 | (+) | 28936908 | 16 | (-) | 28996081 | 5 | 0 | deletion  | 59173  | Promoter of RABEP2(-): 376bp from tx start | Promoter of LAT(+): 66bp from tx start          |
| Rec-1 | MCL | 9  | (+) | 21869788 | 9  | (-) | 22103702 | 4 | 0 | deletion  | 233914 | IGR: 4Kb after MTAP(+)                     | 5'-UTR of CDKN2BAS(+): 17Kb before coding start |
| Rec-1 | MCL | 7  | (+) | 24053842 | 7  | (-) | 24057174 | 3 | 0 | deletion  | 3332   | IGR: 270Kb before NPY(+)                   | IGR: 267Kb before NPY(+)                        |
| Rec-1 | MCL | 8  | (-) | 41892389 | 12 | (-) | 19241842 | 3 | 0 | inter_chr | NaN    | Intron of MYST3(-): 14Kb after exon 3      | IGR: 41Kb before PLEKHA5(+)                     |

Supplementary table 3

| Sample     | Chr 1 | Strand 1 | Position 1 | Chr 2 | Strand 2 | Position 2 | Class     | Target gene | Site 1                                  | Site 2                                   | WGS supporting read pairs | Normal panel read pairs | Functional derivative chromosome | Detected by PEAR-ChIP                 | PEAR-ChIP read pairs | PEAR-ChIP reads fold change over WGS | PEAR-ChIP Enrichment over WGS | Total WGS read pairs | Total H3K27ac read pairs |
|------------|-------|----------|------------|-------|----------|------------|-----------|-------------|-----------------------------------------|------------------------------------------|---------------------------|-------------------------|----------------------------------|---------------------------------------|----------------------|--------------------------------------|-------------------------------|----------------------|--------------------------|
| DOHH-2     | 14    | (-)      | 106379091  | 18    | (+)      | 60793492   | inter_chr | BCL2        | IGR: 5Kb before KIAA0125(+)             | 3'-UTR of BCL2(-): 2Kb after coding stop | 20                        | 0                       | No                               | No, detected reciprocal rearrangement |                      |                                      |                               | 516,649,244          | 32,859,703               |
| DOHH-2     | 14    | (+)      | 106329465  | 18    | (-)      | 60793498   | inter_chr | BCL2        | IGR: 54Kb before KIAA0125(+)            | 3'-UTR of BCL2(-): 2Kb after coding stop | 24                        | 0                       | Yes                              | Yes                                   | 407                  | 16.96                                | 266.63                        | 516,649,244          | 32,859,703               |
| DOHH-2     | 8     | (+)      | 128748200  | 14    | (-)      | 106114286  | inter_chr | MYC         | Promoter of MYC(+): 115bp from tx start | IGR: 121Kb before TMEM121(+)             | 16                        | 0                       | No                               | No, detected reciprocal rearrangement |                      |                                      |                               | 516,649,244          | 32,859,703               |
| DOHH-2     | 8     | (-)      | 128748204  | 14    | (+)      | 106114283  | inter_chr | MYC         | Promoter of MYC(+): 110bp from tx start | IGR: 121Kb before TMEM121(+)             | 10                        | 0                       | Yes                              | Yes                                   | 21                   | 2.10                                 | 33.02                         | 516,649,244          | 32,859,703               |
| Karpas-422 | 14    | (-)      | 106363806  | 18    | (+)      | 60793486   | inter_chr | BCL2        | IGR: 20Kb before KIAA0125(+)            | 3'-UTR of BCL2(-): 2Kb after coding stop | 23                        | 0                       | No                               | No, detected reciprocal rearrangement |                      |                                      |                               | 495,169,085          | 33,946,517               |
| Karpas-422 | 14    | (+)      | 106330464  | 18    | (-)      | 60793493   | inter_chr | BCL2        | IGR: 53Kb before KIAA0125(+)            | 3'-UTR of BCL2(-): 2Kb after coding stop | 52                        | 0                       | Yes                              | Yes                                   | 88                   | 1.69                                 | 24.69                         | 495,169,085          | 33,946,517               |
| Oci-Ly-1   | 14    | (-)      | 106363814  | 18    | (+)      | 60793548   | inter_chr | BCL2        | IGR: 20Kb before KIAA0125(+)            | 3'-UTR of BCL2(-): 2Kb after coding stop | 42                        | 0                       | No                               | No, detected reciprocal rearrangement |                      |                                      |                               | 476,682,889          | 15,191,731               |
| Oci-Ly-1   | 14    | (+)      | 106330075  | 18    | (-)      | 60793552   | inter_chr | BCL2        | IGR: 54Kb before KIAA0125(+)            | 3'-UTR of BCL2(-): 2Kb after coding stop | 52                        | 0                       | Yes                              | Yes                                   | 362                  | 6.96                                 | 218.44                        | 476,682,889          | 15,191,731               |
| Oci-Ly-1   | 8     | (+)      | 96243998   | 8     | (+)      | 128761686  | inversion | MYC         | IGR: 14Kb before C8orf37(-)             | IGR: 13Kb before MYC(+)                  | 222                       | 0                       | Yes                              | Yes                                   | 420                  | 1.89                                 | 59.36                         | 476,682,889          | 15,191,731               |
| Oci-Ly-7   | 8     | (+)      | 128748095  | 14    | (-)      | 107170887  | inter_chr | MYC         | Promoter of MYC(+): 220bp from tx start | IGR: 232Kb before LOC100133469(+)        | 22                        | 0                       | No                               | No, detected reciprocal rearrangement |                      |                                      |                               | 433,079,741          | 45,818,574               |
| Oci-Ly-7   | 8     | (-)      | 128748108  | 14    | (+)      | 107170921  | inter_chr | MYC         | Promoter of MYC(+): 201bp from tx start | IGR: 232Kb before LOC100133469(+)        | 7                         | 0                       | Yes                              | Yes                                   | 45                   | 6.43                                 | 60.76                         | 433,079,741          | 45,818,574               |
