# Supplementary material
Source: PubMed Central journal article supplement (PMC4592453)

# Supplementary Figure 1

A.

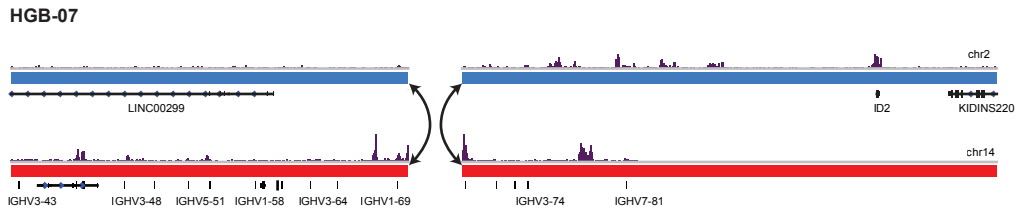

B.

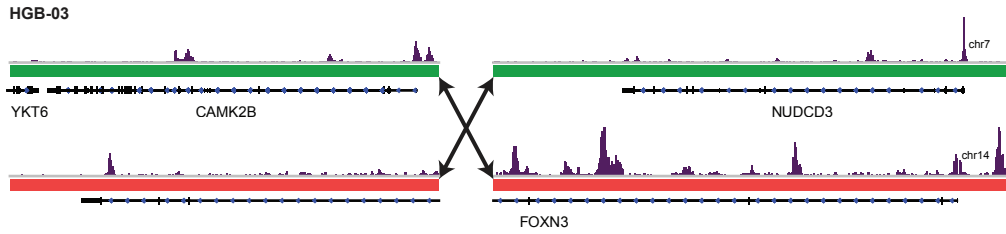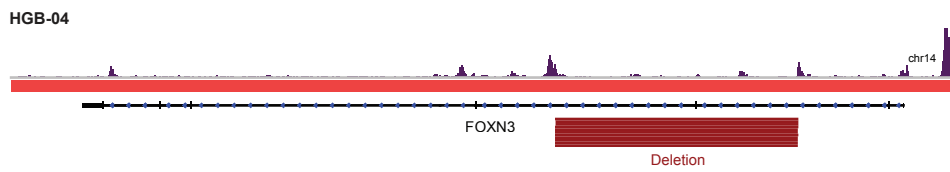

C.

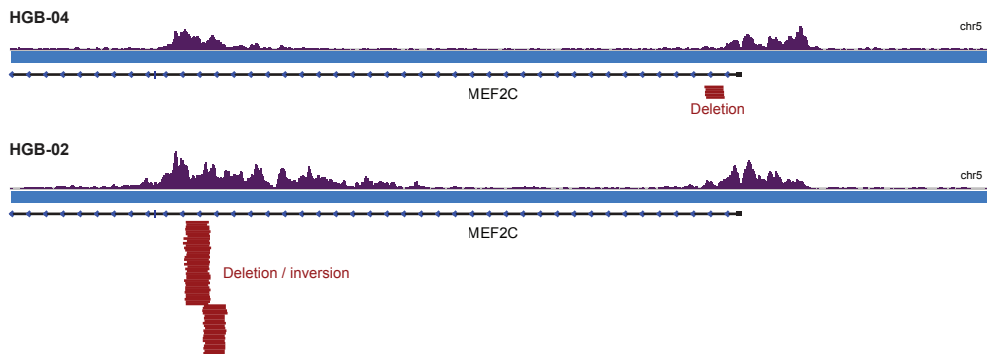

D.

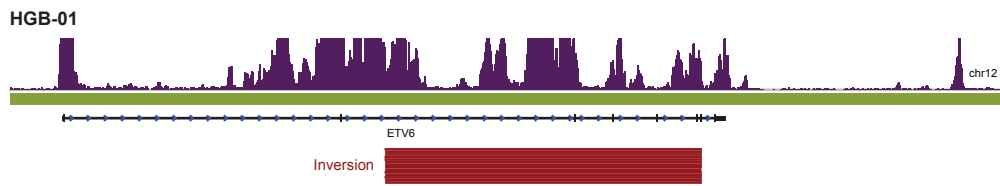

E.

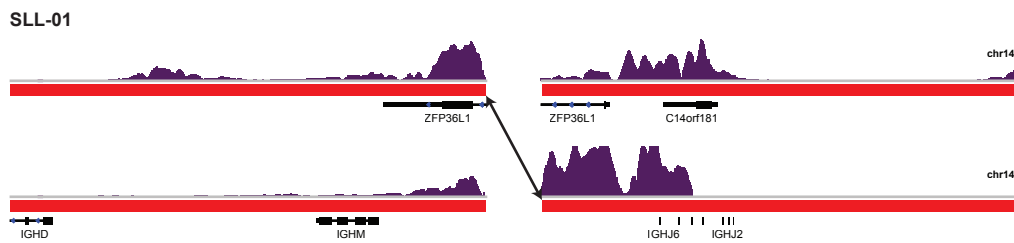

F.

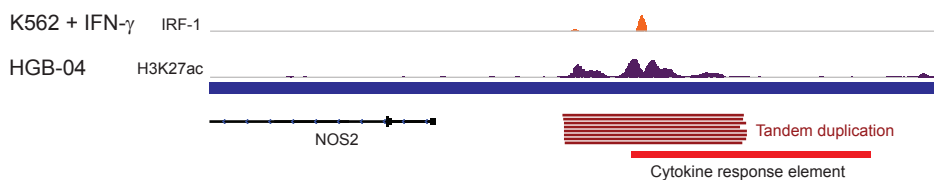

Supplement: NIHMS712901-supplement-2.pdf [file NIHMS712901-supplement-2.pdf]
